# Supplementary material for: Bempedoic acid in patients with type 2 diabetes mellitus, prediabetes, and normoglycaemia: A post hoc analysis of efficacy and glycaemic control using pooled data from phase 3 clinical trials
Source: PubMed Central journal article supplement — Diabetes Obes Metab. 2022 Feb 3;24(5):868–80. doi: 10.1111/dom.14645 (PMC9306638; doi:10.1111/dom.14645), 2022-02-03
Supplement: DOM-24-868-s001.pdf [file DOM-24-868-s001.pdf]

## SUPPLEMENTAL MATERIAL

**Bempedoic acid in patients with type 2 diabetes mellitus, prediabetes, and normoglycaemia: a post hoc analysis of efficacy and glycaemic control using pooled data from phase 3 clinical trials.**

**TABLE S1. Shift Table for Glycaemic Control by Baseline Category (Crude Incidence)**

| Baseline Glycaemic Control Status                         | Post-Baseline Glycaemic Control Status, % (n) |                          |                                 |                           |
|-----------------------------------------------------------|-----------------------------------------------|--------------------------|---------------------------------|---------------------------|
|                                                           | Normoglycaemia <sup>d</sup>                   | Prediabetes <sup>e</sup> | New Onset Diabetes <sup>f</sup> | Undetermined <sup>g</sup> |
| <b>Normoglycaemia<sup>a</sup></b>                         |                                               |                          |                                 |                           |
| Bempedoic acid (n = 410)                                  | 67.8 (278)                                    | 22.9 (94)                | 0.5 (2)                         | 8.8 (36)                  |
| Placebo (n = 208)                                         | 70.7 (147)                                    | 21.6 (45)                | 0.5 (1)                         | 7.2 (15)                  |
| <b>Prediabetes<sup>b</sup></b>                            |                                               |                          |                                 |                           |
| Bempedoic acid (n = 1259)                                 | 23.4 (295)                                    | 64.0 (806)               | 4.5 (57)                        | 8.0 (101)                 |
| Placebo (n = 609)                                         | 25.8 (157)                                    | 63.5 (387)               | 5.9 (36)                        | 4.8 (29)                  |
|                                                           | Last HbA1c Level, % (n)                       |                          |                                 |                           |
|                                                           | ≤ 5.6%                                        | 5.7 – 6.4%               | ≥ 6.5%                          | Undetermined              |
| <b>Diabetes with HbA1c ≥ 6.5% at baseline<sup>c</sup></b> |                                               |                          |                                 |                           |
| Bempedoic acid (n = 455)                                  | 1.1 (5)                                       | 15.2 (69)                | 74.5 (339)                      | 9.2 (42)                  |
| Placebo (n = 232)                                         | 0                                             | 14.2 (33)                | 80.6 (187)                      | 5.2 (12)                  |

<sup>a</sup>Patients not fulfilling the criteria for diabetes or prediabetes.

<sup>b</sup>Patients with all the following: no medical history of diabetes; not receiving diabetes medication prior to baseline; and HbA1c of 5.7% to 6.4% (inclusive) at baseline, or ≥1 fasting glucose value of ≥100 mg/dL, but not more than 1 value ≥126 mg/dL between screening and randomization.

<sup>c</sup>Patients with 1 or more of the following: history of type 1 or type 2 diabetes; receiving diabetes medication prior to baseline; and/or HbA1c ≥6.5% at baseline, or ≥1 fasting plasma glucose value ≥100 mg/dL, but not more than 1 value ≥126 mg/dL between screening and randomization. All patients with diabetes in this analysis had HbA1c ≥6.5% at baseline.

<sup>d</sup>Post-baseline criteria for normoglycemic included HbA1c ≤5.6% and no diabetes medication added.

<sup>e</sup>Post-baseline criteria for prediabetes included HbA1c 5.7 – 6.4% and no diabetes medication added.

<sup>f</sup>Patients with 1 or more of the following: ≥1 HbA1c value ≥6.5%; ≥2 fasting serum glucose values ≥126 mg/dL; an investigator-reported diabetes-related adverse event; and/or initiation of diabetes medication at any point after baseline.

<sup>g</sup>Undetermined due to absence of post-baseline HbA1c levels.

*Abbreviations:* HbA1c, glycated haemoglobin.

**TABLE S2** Safety overview

| Parameter                                                       | Exposure-Adjusted Incidence, per 100 Person-Years ( <i>n</i> ) |                              |                          |                              |                             |                              |
|-----------------------------------------------------------------|----------------------------------------------------------------|------------------------------|--------------------------|------------------------------|-----------------------------|------------------------------|
|                                                                 | Diabetes <sup>a</sup>                                          |                              | Prediabetes <sup>b</sup> |                              | Normoglycaemia <sup>c</sup> |                              |
|                                                                 | BA<br>( <i>n</i> = 755)                                        | Placebo<br>( <i>n</i> = 380) | BA<br>( <i>n</i> = 1259) | Placebo<br>( <i>n</i> = 609) | BA<br>( <i>n</i> = 410)     | Placebo<br>( <i>n</i> = 208) |
| Any TEAE                                                        | 86.5 (552)                                                     | 86.3 (290)                   | 86.7 (917)               | 79.0 (427)                   | 89.6 (302)                  | 88.6 (151)                   |
| TEAE leading to IMP discontinuation                             | 12.4 (79)                                                      | 10.4 (35)                    | 14.4 (152)               | 6.8 (37)                     | 12.5 (42)                   | 12.3 (21)                    |
| Most common TEAEs $\geq 5$ per 100 PY ( <i>n</i> ) in any group |                                                                |                              |                          |                              |                             |                              |
| Nasopharyngitis                                                 | 8.0 (51)                                                       | 6.8 (23)                     | 8.4 (89)                 | 13.0 (70)                    | 11.9 (40)                   | 7.6 (13)                     |
| Urinary tract infection                                         | 6.7 (43)                                                       | 7.4 (25)                     | 4.4 (47)                 | 5.2 (28)                     | 5.9 (20)                    | 7.6 (13)                     |
| Myalgia                                                         | 4.9 (31)                                                       | 6.3 (21)                     | 6.5 (69)                 | 5.7 (31)                     | 5.3 (18)                    | 6.5 (11)                     |
| Upper respiratory tract infection                               | 4.9 (31)                                                       | 3.0 (10)                     | 4.5 (48)                 | 5.2 (28)                     | 4.5 (15)                    | 3.5 (6)                      |
| Hypoglycaemia                                                   | 4.5 (29)                                                       | 5.7 (19)                     | 0.6 (6)                  | 0.7 (4)                      | 1.5 (5)                     | 0.6 (1)                      |
| Arthralgia                                                      | 4.4 (28)                                                       | 5.4 (18)                     | 5.2 (55)                 | 4.8 (26)                     | 5.0 (17)                    | 7.6 (13)                     |
| Dizziness                                                       | 4.4 (28)                                                       | 5.4 (18)                     | 3.5 (37)                 | 3.3 (18)                     | 5.3 (18)                    | 2.9 (5)                      |
| Diarrhoea                                                       | 4.1 (26)                                                       | 6.0 (20)                     | 4.1 (43)                 | 3.0 (16)                     | 3.9 (13)                    | 1.8 (3)                      |
| Muscle spasm                                                    | 3.4 (22)                                                       | 3.3 (11)                     | 4.5 (48)                 | 3.1 (17)                     | 5.6 (19)                    | 1.8 (3)                      |
| Osteoarthritis                                                  | 3.0 (19)                                                       | 3.3 (11)                     | 1.9 (20)                 | 2.8 (15)                     | 2.7 (9)                     | 5.3 (9)                      |
| Angina pectoris                                                 | 2.4 (15)                                                       | 3.0 (10)                     | 2.5 (26)                 | 2.0 (11)                     | 2.4 (8)                     | 5.3 (9)                      |

Note: TEAE incidence is defined as the number of patients having an event started in a certain period divided by the total person-time (in 100 PY) at risk during this period.

<sup>a</sup>Patients with 1 or more of the following: history of type 1 or type 2 diabetes; receiving diabetes medication prior to baseline; and/or HbA1c  $\geq 6.5\%$  (48 mmol/mol) at baseline, or  $\geq 1$  fasting plasma glucose value  $\geq 100$  mg/dL, but not more than 1 value  $\geq 126$  mg/dL between screening and randomization.

<sup>b</sup>Patients with all the following: no medical history of diabetes; not receiving diabetes medication prior to baseline; and HbA1c of 5.7% (39 mmol/mol) to 6.4% (46 mmol/mol) (inclusive) at baseline, or  $\geq 1$  fasting glucose value of  $\geq 100$  mg/dL, but not more than 1 value  $\geq 126$  mg/dL between screening and randomization.

<sup>c</sup>Patients not fulfilling the criteria for diabetes or prediabetes.

*Abbreviations:* BA, bempedoic acid; HbA1c, glycated haemoglobin; IMP, investigational medicinal product; PY, person-years; TEAE, treatment-emergent adverse event.
